# Supplementary material for: Treatment with Lobeglitazone Attenuates Hepatic Steatosis in Diet-Induced Obese Mice
Source: Hindawi journal article supplement (doi:10.1155/2018/4292509), 2018-06-13

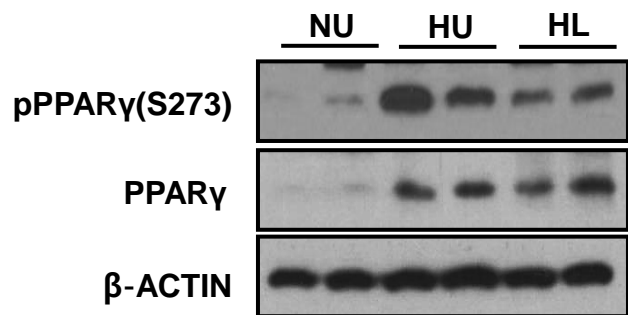

Supplement: f1 [file 4292509.f1.pdf]
